# Supplementary material for: Designing questionnaires: healthcare survey to compare two different response scales
Source: PubMed Central journal article supplement (PMC4126910; doi:10.1186/1471-2288-14-96), 2014-08-03
Supplement: 1471-2288-14-96-S2.pdf [file 1471-2288-14-96-S2.pdf]

**Additional file 2: Baseline characteristics of patients without returned questionnaire.**

Characteristics of patients who did not return their questionnaire: all patients (n=4201 (59%)) and within the pre-defined subgroups short versus long hospital stay (n=2243 (53%) vs. n=1958 (47%)) and emergency versus elective admission (n=2040 (49%) vs. n=2122 (51%))

|                                                 | Total<br>(n=4201) | Length of Hospital Stay<br>(n=4201)        |                                            | Admission<br>(n=4162)                  |                                       |
|-------------------------------------------------|-------------------|--------------------------------------------|--------------------------------------------|----------------------------------------|---------------------------------------|
|                                                 |                   | Length of Stay<br>≤ 4 Days<br>n=2243 (53%) | Length of Stay<br>> 4 Days<br>n=1958 (47%) | Emergency<br>Admission<br>n=2040 (49%) | Elective<br>Admission<br>n=2122 (51%) |
| <b>Age in years,</b><br>mean (SD)               | 58 (20)           | 55 (21)                                    | 62 (19)                                    | 63 (21)                                | 54 (19)                               |
| <b>Gender, n (%)</b>                            |                   |                                            |                                            |                                        |                                       |
| Male                                            | 2004 (48%)        | 1072 (48%)                                 | 932 (48%)                                  | 1013 (50%)                             | 967 (46%)                             |
| Female                                          | 2197 (52%)        | 1171 (52%)                                 | 1026 (52%)                                 | 1027 (50%)                             | 1155 (54%)                            |
| <b>Length of hospital stay,</b><br>median (IQR) | 4 (2 – 9)         | 2 (1 – 3)                                  | 9 (7 – 14)                                 | 5 (1 – 10)                             | 4 (2 - 7)                             |
| <b>Hospitalisation, n (%)</b>                   |                   |                                            |                                            |                                        |                                       |
| Emergency                                       | 2040 (49%)        | 991 (44%)                                  | 1049 (54%)                                 |                                        |                                       |
| Elective                                        | 2122 (51%)        | 1236 (55%)                                 | 886 (45%)                                  |                                        |                                       |
| Not Defined                                     | 39 (1%)           | 16 (1%)                                    | 23 (1%)                                    |                                        |                                       |
| Length of Stay ≤ 4 Days                         | 2243 (53%)        |                                            |                                            | 991 (49%)                              | 1236 (58%)                            |
| Length of Stay > 4 Days                         | 1958 (47%)        |                                            |                                            | 1049 (51%)                             | 886 (42%)                             |
| <b>Department, n (%)</b>                        |                   |                                            |                                            |                                        |                                       |
| Surgery                                         | 1516 (36%)        | 687 (31%)                                  | 829 (42%)                                  | 713 (35%)                              | 771 (36%)                             |
| Internal Medicine                               | 1567 (37%)        | 838 (37%)                                  | 729 (37%)                                  | 1015 (50%)                             | 552 (26%)                             |
| Gynaecology and Obstetrics                      | 514 (12%)         | 321 (14%)                                  | 193 (10%)                                  | 53 (3%)                                | 461 (22%)                             |
| Otorhinolaryngology                             | 172 (4%)          | 132 (6%)                                   | 40 (2%)                                    | 50 (2%)                                | 118 (6%)                              |
| Radiology                                       | 85 (2%)           | 84 (4%)                                    | 1 (<1%)                                    | 22 (1%)                                | 85 (4%)                               |
| Ophthalmology                                   | 82 (2%)           | 67 (3%)                                    | 15 (1%)                                    | 103 (5%)                               | 59 (3%)                               |
| Geriatric Medicine                              | 114 (3%)          | 9 (<1%)                                    | 105 (5%)                                   | 78 (4%)                                | 11 (1%)                               |
| Intensive Care Unit                             | 115 (3%)          | 95 (4%)                                    | 20 (1%)                                    | 5 (<1%)                                | 35 (2%)                               |
| Dermatology and Venereology                     | 35 (1%)           | 9 (<1%)                                    | 26 (1%)                                    | 52 (5%)                                | 30 (1%)                               |
| Missing                                         | 1 (<1%)           | 1 (<1%)                                    |                                            | 1 (<1%)                                |                                       |

|  | Total<br>(n=4201) | Length of Hospital Stay<br>(n=4201)        |                                            | Admission<br>(n=4162)                  |                                       |
|--|-------------------|--------------------------------------------|--------------------------------------------|----------------------------------------|---------------------------------------|
|  |                   | Length of Stay<br>≤ 4 Days<br>n=2243 (53%) | Length of Stay<br>> 4 Days<br>n=1958 (47%) | Emergency<br>Admission<br>n=2040 (49%) | Elective<br>Admission<br>n=2122 (51%) |

| <b>Nationality, n (%)</b>            |            |            |            |            |            |
|--------------------------------------|------------|------------|------------|------------|------------|
| Swiss                                | 2899 (69%) | 1446 (64%) | 1453 (74%) | 1490 (73%) | 1383 (65%) |
| German, Austrian,<br>Liechtensteiner | 312 (7%)   | 191 (9%)   | 121 (6%)   | 152 (7%)   | 158 (7%)   |
| French                               | 48 (1%)    | 23 (1%)    | 25 (1%)    | 19 (1%)    | 27 (1%)    |
| Italian                              | 175 (4%)   | 95 (4%)    | 80 (4%)    | 101 (5%)   | 74 (3%)    |
| English, Irish                       | 38 (1%)    | 22 (1%)    | 16 (1%)    | 16 (1%)    | 21 (1%)    |
| Turkish                              | 143 (3%)   | 91 (4%)    | 52 (3%)    | 53 (3%)    | 88 (4%)    |
| European, other                      | 297 (7%)   | 182 (8%)   | 115 (6%)   | 115 (6%)   | 179 (8%)   |
| US-American, Canadian,<br>Australian | 36 (1%)    | 24 (1%)    | 12 (1%)    | 12 (1%)    | 23 (1%)    |
| Extra-European, other                | 202 (5%)   | 132 (6%)   | 70 (4%)    | 73 (4%)    | 129 (6%)   |
| Missing                              | 51 (1%)    | 37 (2%)    | 14 (1%)    | 9 (<1%)    | 40 (2%)    |
| <b>Language, n (%)</b>               |            |            |            |            |            |
| German                               | 3971 (95%) | 2101 (94%) | 1870 (96%) | 1938 (95%) | 1996 (94%) |
| French                               | 39 (1%)    | 22 (1%)    | 17 (1%)    | 16 (1%)    | 22 (1%)    |
| Italian                              | 44 (1%)    | 22 (1%)    | 22 (1%)    | 30 (1%)    | 14 (1%)    |
| English                              | 57 (1%)    | 42 (2%)    | 15 (1%)    | 19 (1%)    | 37 (2%)    |
| Turkish                              | 47 (1%)    | 28 (1%)    | 19 (1%)    | 23 (1%)    | 24 (1%)    |
| Others                               | 43 (1%)    | 28 (1%)    | 15 (1%)    | 14 (1%)    | 29 (1%)    |
