# Supplementary material for: Designing questionnaires: healthcare survey to compare two different response scales
Source: PubMed Central journal article supplement (PMC4126910; doi:10.1186/1471-2288-14-96), 2014-08-03
Supplement: 1471-2288-14-96-S3.pdf [file 1471-2288-14-96-S3.pdf]

**Additional file 3: Baseline characteristics of patients with entire completion of all questions on both scales.**

Characteristics of patients who returned the questionnaire and completely filled out all questions on both response scales corresponding to the analysis population for response scale comparison: all patients (n= 2400 (34%)) and within the pre-defined subgroups short versus long hospital stay (n=1223 (51%) vs. n=1177 (49%)) and emergency versus elective admission (n=849 (36%) vs. n=1531 (64%))

|                                                  | Total<br>(n=2400) | Length of Hospital Stay<br>(n=2400)        |                                            | Admission<br>(n=2380)                 |                                       |
|--------------------------------------------------|-------------------|--------------------------------------------|--------------------------------------------|---------------------------------------|---------------------------------------|
|                                                  |                   | Length of Stay<br>≤ 4 Days<br>n=1223 (51%) | Length of Stay<br>> 4 Days<br>n=1177 (49%) | Emergency<br>Admission<br>n=849 (36%) | Elective<br>Admission<br>n=1531 (64%) |
|                                                  |                   | <b>Age in years,<br/>mean (SD)</b>         | 59 (19)                                    | 56 (19)                               | 62 (18)                               |
| <b>Gender, n (%)</b>                             |                   |                                            |                                            |                                       |                                       |
| Male                                             | 1191 (50%)        | 701 (47%)                                  | 718 (49%)                                  | 468 (55%)                             | 709 (46%)                             |
| Female                                           | 1209 (50%)        | 781 (53%)                                  | 757 (51%)                                  | 381 (45%)                             | 822 (54%)                             |
| <b>Length of hospital stay,<br/>median (IQR)</b> | 4 (2 – 9)         | 2 (1 – 3)                                  | 9 (7 – 13)                                 | 6 (2 – 11)                            | 4 (2 – 8)                             |
| <b>Hospitalisation, n (%)</b>                    |                   |                                            |                                            |                                       |                                       |
| Emergency                                        | 849 (35%)         | 350 (29%)                                  | 499 (42%)                                  |                                       |                                       |
| Elective                                         | 1531 (64%)        | 869 (71%)                                  | 662 (56%)                                  |                                       |                                       |
| Not Defined                                      | 20 (1%)           | 4 (<1%)                                    | 16 (1%)                                    |                                       |                                       |
| Length of Stay ≤ 4 Days                          | 1223 (51%)        |                                            |                                            | 350 (41%)                             | 869 (57%)                             |
| Length of Stay > 4 Days                          | 1177 (49%)        |                                            |                                            | 499 (59%)                             | 662 (43%)                             |
| <b>Department, n (%)</b>                         |                   |                                            |                                            |                                       |                                       |
| Surgery                                          | 959 (40%)         | 349 (29%)                                  | 610 (52%)                                  | 332 (39%)                             | 609 (40%)                             |
| Internal Medicine                                | 754 (31%)         | 408 (33%)                                  | 346 (29%)                                  | 402 (47%)                             | 352 (23%)                             |
| Gynaecology and Obstetrics                       | 371 (15%)         | 232 (19%)                                  | 139 (12%)                                  | 19 (2%)                               | 351 (23%)                             |
| Otorhinolaryngology                              | 95 (4%)           | 79 (6%)                                    | 16 (1%)                                    | 13 (2%)                               | 81 (5%)                               |
| Radiology                                        | 65 (3%)           | 65 (5%)                                    | 0 (0%)                                     | 0 (0%)                                | 65 (4%)                               |
| Ophthalmology                                    | 46 (2%)           | 43 (4%)                                    | 3 (<1%)                                    | 11 (1%)                               | 35 (2%)                               |
| Geriatric Medicine                               | 43 (2%)           | 2 (<1%)                                    | 41 (3%)                                    | 39 (5%)                               | 4 (<1%)                               |
| Intensive Care Unit                              | 41 (2%)           | 39 (3%)                                    | 2 (<1%)                                    | 27 (3%)                               | 14 (1%)                               |
| Dermatology and Venereology                      | 26 (1%)           | 6 (<1%)                                    | 20 (2%)                                    | 6 (1%)                                | 20 (1%)                               |

|  | Total<br>(n=2400) | Length of Hospital Stay<br>(n=2400)        |                                            | Admission<br>(n=2380)                 |                                       |
|--|-------------------|--------------------------------------------|--------------------------------------------|---------------------------------------|---------------------------------------|
|  |                   | Length of Stay<br>≤ 4 Days<br>n=1223 (51%) | Length of Stay<br>> 4 Days<br>n=1177 (49%) | Emergency<br>Admission<br>n=849 (36%) | Elective<br>Admission<br>n=1531 (64%) |

| <b>Nationality, n (%)</b>            |            |            |            |           |            |
|--------------------------------------|------------|------------|------------|-----------|------------|
| Swiss                                | 1815 (76%) | 877 (72%)  | 938 (80%)  | 675 (80%) | 1126 (74%) |
| German, Austrian,<br>Liechtensteiner | 189 (8%)   | 108 (9%)   | 81 (7%)    | 55 (6%)   | 132 (9%)   |
| French                               | 30 (1%)    | 19 (2%)    | 11 (1%)    | 4 (<1%)   | 26 (2%)    |
| Italian                              | 84 (4%)    | 42 (3%)    | 42 (4%)    | 35 (4%)   | 48 (3%)    |
| English, Irish                       | 9 (<1%)    | 4 (<1%)    | 5 (<1%)    | 6 (1%)    | 3 (<1%)    |
| Turkish                              | 43 (2%)    | 26 (2%)    | 17 (1%)    | 12 (1%)   | 30 (2%)    |
| European, other                      | 132 (6%)   | 82 (7%)    | 50 (4%)    | 39 (5%)   | 93 (6%)    |
| US-American, Canadian,<br>Australian | 15 (1%)    | 14 (1%)    | 1 (<1%)    | 4 (<1%)   | 10 (1%)    |
| Extra-European, other                | 50 (2%)    | 30 (2%)    | 20 (2%)    | 17 (2%)   | 33 (2%)    |
| Missing                              | 33 (1%)    | 21 (2%)    | 12 (1%)    | 2 (<1%)   | 30 (2%)    |
| <b>Language, n (%)</b>               |            |            |            |           |            |
| German                               | 2267 (94%) | 1147 (94%) | 1120 (95%) | 808 (95%) | 1442 (94%) |
| French                               | 39 (2%)    | 22 (2%)    | 17 (1%)    | 8 (1%)    | 31 (2%)    |
| Italian                              | 33 (1%)    | 16 (1%)    | 17 (1%)    | 17 (2%)   | 14 (1%)    |
| English                              | 24 (1%)    | 18 (1%)    | 6 (1%)     | 9 (1%)    | 15 (1%)    |
| Turkish                              | 13 (1%)    | 6 (<1%)    | 7 (1%)     | 2 (<1%)   | 10 (1%)    |
| Others                               | 24 (1%)    | 14 (1%)    | 10 (1%)    | 5 (1%)    | 19 (1%)    |
