# Supplementary material for: Designing questionnaires: healthcare survey to compare two different response scales
Source: PubMed Central journal article supplement (PMC4126910; doi:10.1186/1471-2288-14-96), 2014-08-03
Supplement: 1471-2288-14-96-S7.pdf [file 1471-2288-14-96-S7.pdf]

## **Additional file 5: Subgroup results**

Main analysis repeated in an exploratory way across the prespecified subgroups short versus long hospital stay and emergency versus elective admission.

NS=Numeric Scale, LS=Labelled Scale. LL=Lower Limit. CI=Confidence Interval.

NA = I didn't have any questions for staff.

Corr. Coeff. Correlation Coefficient

### **a) Questionnaire results on a numeric or a labelled adjectival response scale**

**(n = 2400)**

The answering scale in the NS had anchoring labels at 0 and 10 of

- 'Certainly not – Yes, of course' for the first question,
- 'Poor – Excellent' for the second question, and
- 'No, never – Yes, always' for questions 3 to 5, respectively.

The categories of the answering scale in the LS were labelled with

- 'Of course not (A) – No, I don't think so (B) – Yes, I think so (C) – Yes, of course (D)' for the first question,
- 'Poor (A) – Fair (B) – Good (C) – Excellent (D)' for the second question, and
- 'No (A) – Yes, sometimes (B) – Yes, always (C) –for questions 3 to 5, respectively.

According to length of hospital stay (n=2400)

| Questions              | Subgroup | Numeric Scale (NS) |     |     |     |     |    |    |    |     |     |     |    | Labelled Scale (LS) |     |     |     |     |
|------------------------|----------|--------------------|-----|-----|-----|-----|----|----|----|-----|-----|-----|----|---------------------|-----|-----|-----|-----|
|                        |          | 0                  | 1   | 2   | 3   | 4   | 5  | 6  | 7  | 8   | 9   | 10  | NA | A                   | B   | C   | D   | NA  |
| Return                 | ≤ 4 days | 1%                 | <1% | 1%  | <1% | 1%  | 1% | 1% | 4% | 11% | 12% | 67% | -  | 1%                  | 3%  | 21% | 75% | -   |
|                        | > 4 days | 1%                 | <1% | 1%  | 1%  | 1%  | 2% | 1% | 4% | 11% | 14% | 66% | -  | 1%                  | 2%  | 25% | 72% | -   |
| Quality                | ≤ 4 days | <1%                | <1% | <1% | 1%  | 1%  | 1% | 2% | 5% | 15% | 23% | 52% | -  | 1%                  | 3%  | 36% | 60% | -   |
|                        | > 4 days | <1%                | <1% | <1% | 1%  | 1%  | 2% | 2% | 5% | 15% | 22% | 52% | -  | 1%                  | 3%  | 41% | 55% | -   |
| Question to Physicians | ≤ 4 days | <1%                | <1% | <1% | 1%  | 1%  | 2% | 1% | 4% | 13% | 15% | 56% | 7% | <1%                 | 13% | 77% | -   | 10% |
|                        | > 4 days | <1%                | <1% | <1% | 1%  | 1%  | 2% | 3% | 5% | 15% | 15% | 53% | 4% | 1%                  | 17% | 76% | -   | 6%  |
| Question to Nurses     | ≤ 4 days | <1%                | <1% | <1% | <1% | <1% | 3% | 2% | 5% | 16% | 16% | 48% | 8% | 1%                  | 13% | 81% | -   | 5%  |
|                        | > 4 days | <1%                | <1% | <1% | 1%  | 1%  | 2% | 4% | 6% | 15% | 18% | 47% | 6% | 1%                  | 16% | 80% | -   | 4%  |
| Respect and Dignity    | ≤ 4 days | <1%                | <1% | <1% | 1%  | 1%  | 1% | 1% | 3% | 8%  | 15% | 71% | -  | 1%                  | 8%  | 91% | -   | -   |
|                        | > 4 days | <1%                | <1% | <1% | 1%  | 1%  | 1% | 1% | 3% | 9%  | 15% | 68% | -  | 2%                  | 10% | 89% | -   | -   |

According to hospital admission type (n=2380, i.e. 20 missing values in admission type)

| Questions              | Subgroup  | Numeric Scale (NS) |     |     |     |     |    |    |    |     |     |     |    | Labelled Scale (LS) |     |     |     |     |
|------------------------|-----------|--------------------|-----|-----|-----|-----|----|----|----|-----|-----|-----|----|---------------------|-----|-----|-----|-----|
|                        |           | 0                  | 1   | 2   | 3   | 4   | 5  | 6  | 7  | 8   | 9   | 10  | NA | A                   | B   | C   | D   | NA  |
| Return                 | Emergency | 1%                 | <1% | 1%  | 1%  | 1%  | 2% | 1% | 5% | 11% | 13% | 63% | -  | 1%                  | 3%  | 28% | 67% | -   |
|                        | Elective  | 1%                 | <1% | 1%  | <1% | <1% | 1% | 1% | 4% | 11% | 12% | 69% | -  | 1%                  | 2%  | 20% | 76% | -   |
| Quality                | Emergency | <1%                | -   | <1% | 1%  | 1%  | 2% | 3% | 6% | 16% | 20% | 51% | -  | 1%                  | 4%  | 45% | 51% | -   |
|                        | Elective  | <1%                | <1% | <1% | <1% | 1%  | 1% | 1% | 4% | 15% | 24% | 53% | -  | 1%                  | 3%  | 35% | 61% | -   |
| Question to Physicians | Emergency | <1%                | <1% | <1% | 1%  | 1%  | 3% | 3% | 5% | 15% | 14% | 49% | 8% | 1%                  | 16% | 73% | -   | 10% |
|                        | Elective  | <1%                | <1% | <1% | <1% | 1%  | 2% | 2% | 4% | 13% | 16% | 58% | 4% | <1%                 | 14% | 79% | -   | 7%  |
| Question to Nurses     | Emergency | <1%                | <1% | <1% | 1%  | 1%  | 2% | 2% | 7% | 16% | 16% | 45% | 9% | 1%                  | 17% | 75% | -   | 7%  |
|                        | Elective  | <1%                | <1% | <1% | <1% | 1%  | 2% | 2% | 5% | 16% | 18% | 49% | 6% | 1%                  | 13% | 83% | -   | 3%  |
| Respect and Dignity    | Emergency | <1%                | <1% | <1% | 1%  | 1%  | 1% | 1% | 4% | 10% | 14% | 66% | -  | 2%                  | 10% | 88% | -   | -   |
|                        | Elective  | <1%                | <1% | <1% | <1% | 1%  | 1% | 1% | 2% | 8%  | 16% | 71% | -  | 1%                  | 8%  | 91% | -   | -   |

**b) Spearman's rank correlation coefficient between NS and LS for each item**

Spearman's rank correlation coefficient for each item between both response scales (NS and LS): all patients (n=2400 for question 1, 2, and 5, n=2140 for question 3 and n=2173 for question 4, respectively) and for pre-defined subgroups short versus long hospital stay and emergency versus elective admission

|                     | Hospital Stay ≤ 4 days<br>(n=1223) |            | Hospital Stay > 4 days<br>(n=1177) |            |
|---------------------|------------------------------------|------------|------------------------------------|------------|
| Question            | Corr. Coeff.                       | 95% CI     | Corr. Coeff.                       | 95% CI     |
| Return              | 0.61                               | 0.58, 0.65 | 0.60                               | 0.56, 0.63 |
| Quality             | 0.63                               | 0.60, 0.67 | 0.54                               | 0.50, 0.58 |
| Question to Doctors | 0.27                               | 0.21, 0.32 | 0.37                               | 0.32, 0.42 |
| Question to Nurses  | 0.34                               | 0.28, 0.39 | 0.33                               | 0.27, 0.38 |
| Respect and Dignity | 0.52                               | 0.48, 0.56 | 0.51                               | 0.47, 0.55 |
|                     |                                    |            |                                    |            |
|                     | Emergency Admission<br>(n=849)     |            | Elective Admission<br>(n=1531)     |            |
| Question            | Corr. Coeff.                       | 95% CI     | Corr. Coeff.                       | 95% CI     |
| Return              | 0.61                               | 0.57, 0.65 | 0.60                               | 0.56, 0.63 |
| Quality             | 0.59                               | 0.54, 0.63 | 0.59                               | 0.56, 0.62 |
| Question to Doctors | 0.35                               | 0.29, 0.42 | 0.30                               | 0.25, 0.35 |
| Question to Nurses  | 0.38                               | 0.31, 0.44 | 0.31                               | 0.26, 0.35 |
| Respect and Dignity | 0.55                               | 0.51, 0.60 | 0.50                               | 0.46, 0.53 |

**c) Cronbach's alpha for both response scales**

|       | Hospital Stay ≤ 4 days<br>(n=1223) |              | Hospital Stay > 4 days<br>(n=1177) |              |
|-------|------------------------------------|--------------|------------------------------------|--------------|
| Scale | Cronbach's alpha                   | LL of 95% CI | Cronbach's alpha                   | LL of 95% CI |
| NS    | 0.89                               | 0.883        | 0.89                               | 0.885        |
| LS    | 0.75                               | 0.732        | 0.78                               | 0.764        |
|       |                                    |              |                                    |              |
|       | Emergency Admission<br>(n=849)     |              | Elective Admission<br>(n=1531)     |              |
| Scale | Cronbach's alpha                   | LL of 95% CI | Cronbach's alpha                   | LL of 95% CI |
| NS    | 0.89                               | 0.878        | 0.89                               | 0.886        |
| LS    | 0.79                               | 0.766        | 0.75                               | 0.736        |

**d) Percentage score of the total sum of questionnaire answers**

Percentage of total sum of all 5 answers compared to the maximum possible sum on each scale. The maximum possible sum was reduced for those patients who said they had no questions for hospital staff: All patients (n=2400) and within pre-defined subgroups short versus long hospital stay and emergency versus elective admission

| Percentage Score | Numeric Scale             |                           | Labelled Scale            |                           |
|------------------|---------------------------|---------------------------|---------------------------|---------------------------|
|                  | Hospital Stay<br>≤ 4 days | Hospital Stay<br>> 4 days | Hospital Stay<br>≤ 4 days | Hospital Stay<br>> 4 days |
| Median<br>(IQR)  | 96<br>(88 – 100)          | 96<br>(86 – 100)          | 100<br>(88 – 100)         | 94<br>(88 – 100)          |
|                  | Emergency<br>Admission    | Elective<br>Admission     | Emergency<br>Admission    | Elective<br>Admission     |
| Median<br>(IQR)  | 95<br>(84 – 100)          | 96<br>(88 – 100)          | 94<br>(88 – 100)          | 100<br>(88 – 100)         |
